# Supplementary material
Source: PubMed Central journal article supplement (PMC1877874)

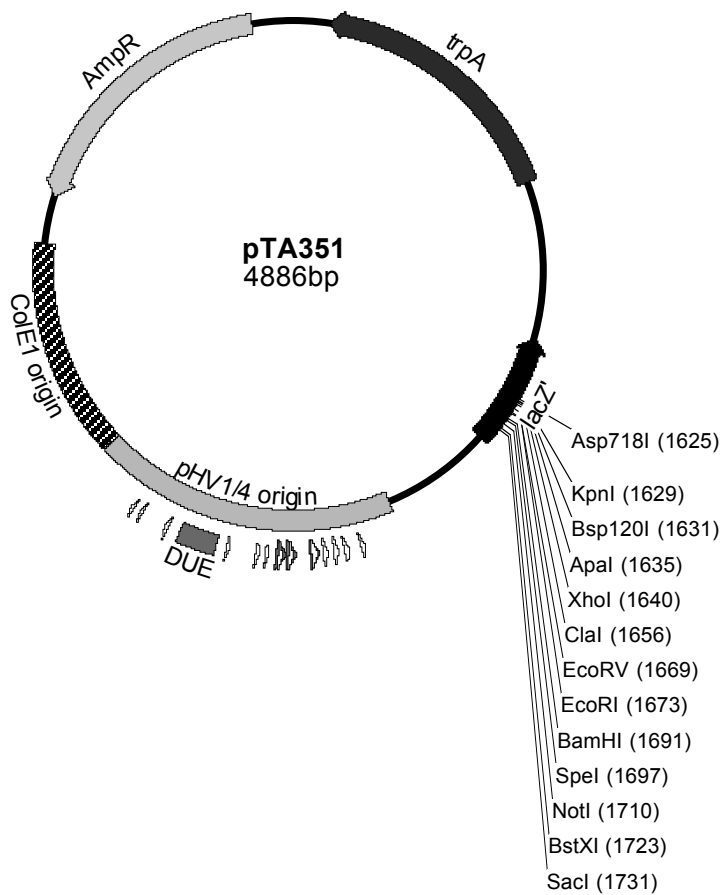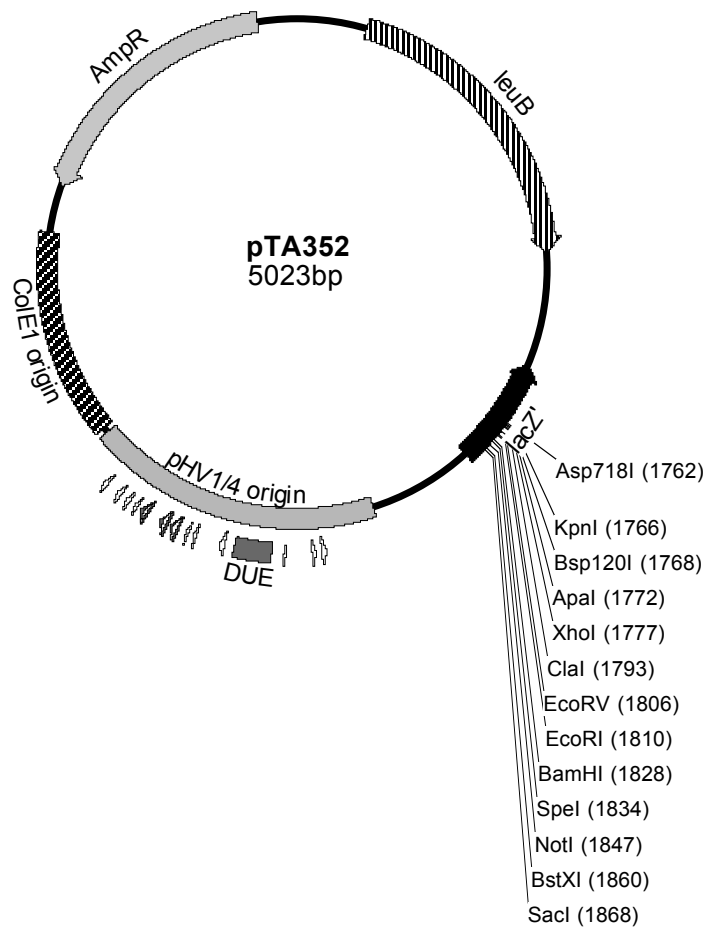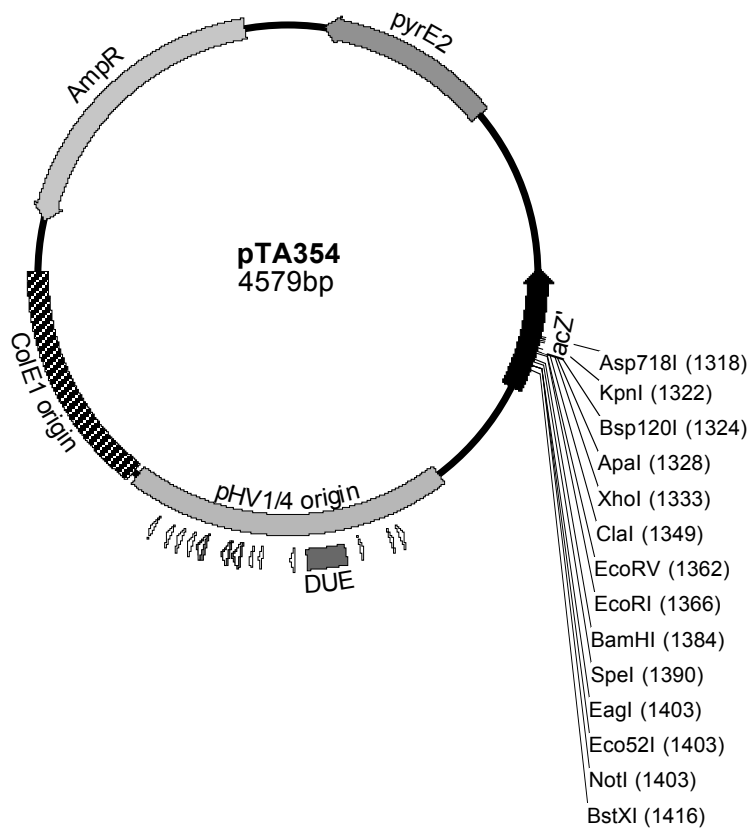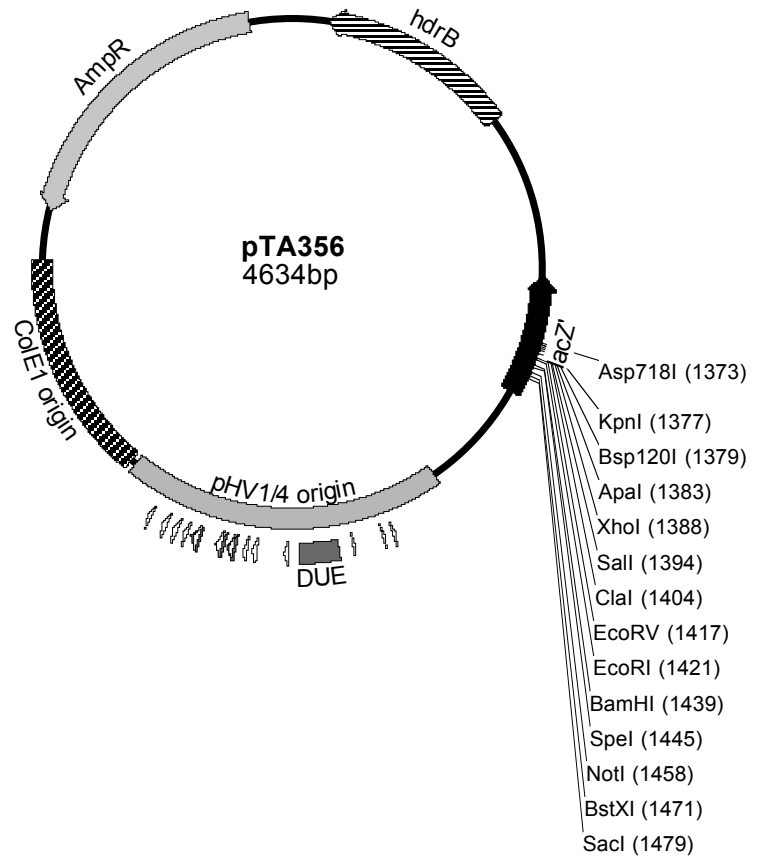

Supplement: pgen.0030077.sg001.pdf [file pgen.0030077.sg001.pdf]

H112 pTA250  
*ori-pHV1/4*

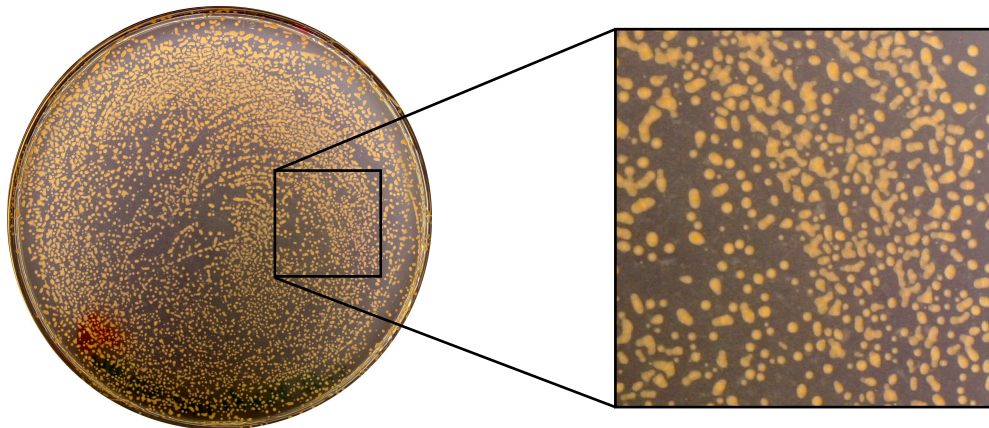

H112 pTA441  
*oriC-1*

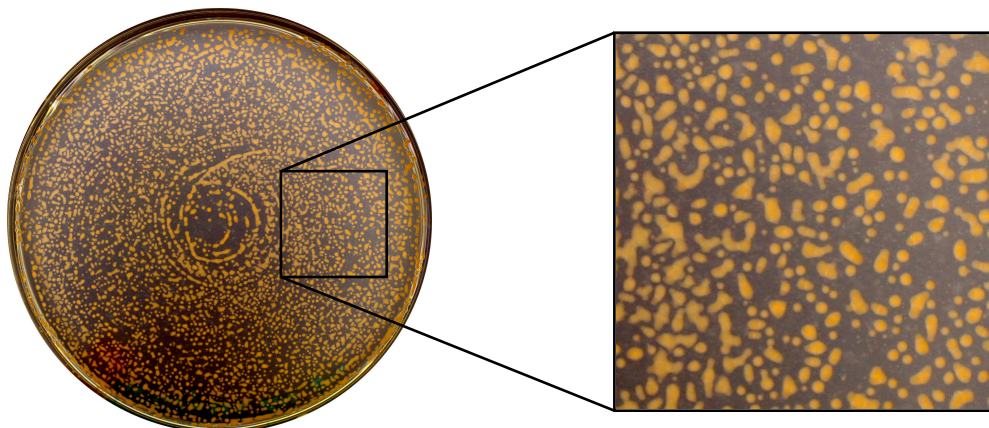

H112 pTA612  
*oriC-2*

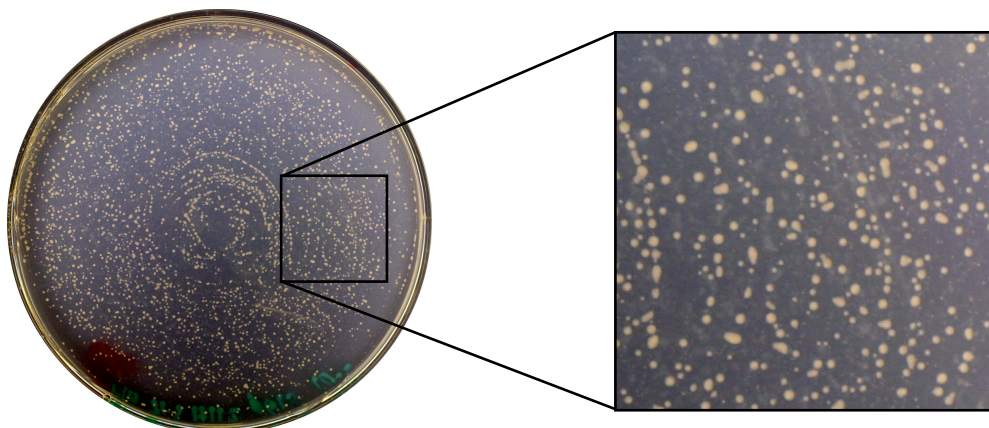

H112 pCN26  
*ori-pHV3*

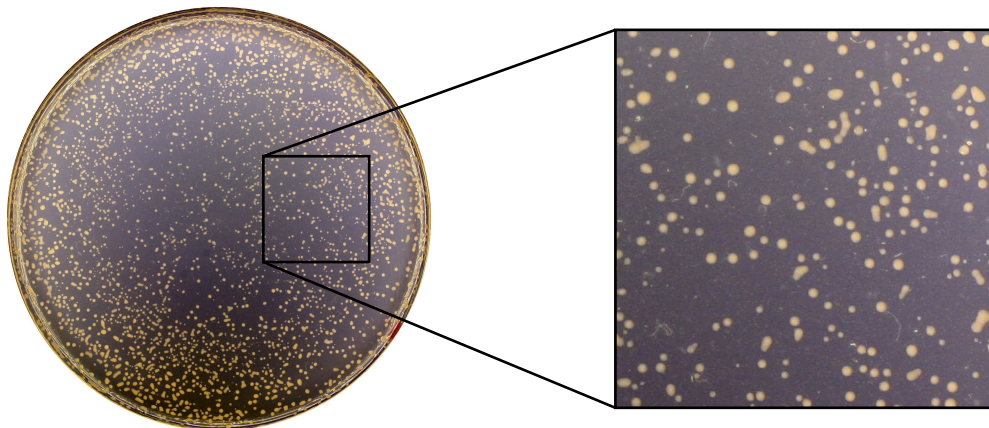

H112 pCN27  
*ori-pHV4-2*

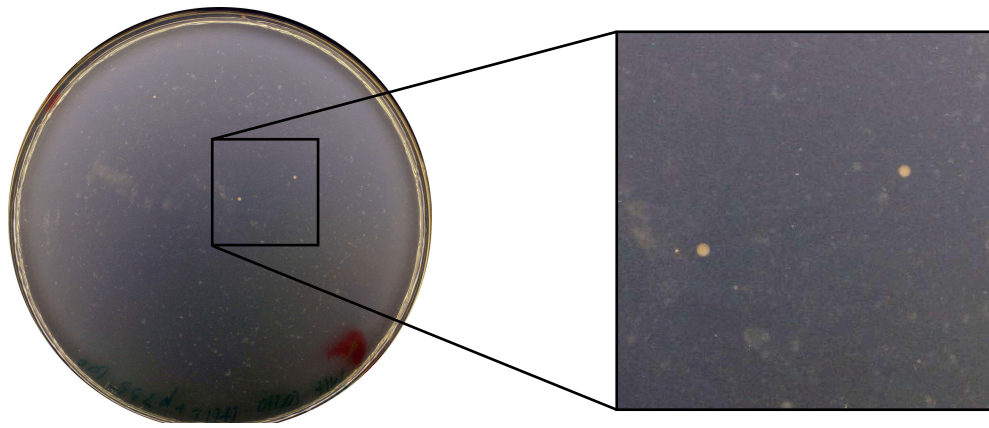

Supplement: pgen.0030077.sg002.pdf [file pgen.0030077.sg002.pdf]
